# Supplementary material for: Redox-triggered switch based on platinum(ii) acetylacetonate complexes bearing an isomeric donor–acceptor conjugation ligand shows a high second-order nonlinear optical response
Source: Royal Society of Chemistry journal article supplement (doi:10.1039/c9nj02183c), 2019-01-01
Supplement: c9nj02183c1.pdf [file c9nj02183c1.pdf]

## Supplementary Information

# **Redox-triggered Switch Based on Platinum(II) Acetylacetonate Complexes Bearing the Isomeric Donor–Acceptor Conjugation Ligand Showing High Second-Order Nonlinear Optical Response**

Yuan Zhang, Hongqiang Wang, Jinting Ye, Yongqing Qiu \*

Institute of Functional Material Chemistry, Faculty of Chemistry, Northeast Normal  
University, Changchun 130024, People's Republic of China

---

\* Corresponding Author. Fax: +86 431 85098768.  
E-mail addresses: [qiuyq466@nenu.edu.cn](mailto:qiuyq466@nenu.edu.cn) (Y. Q. Qiu).

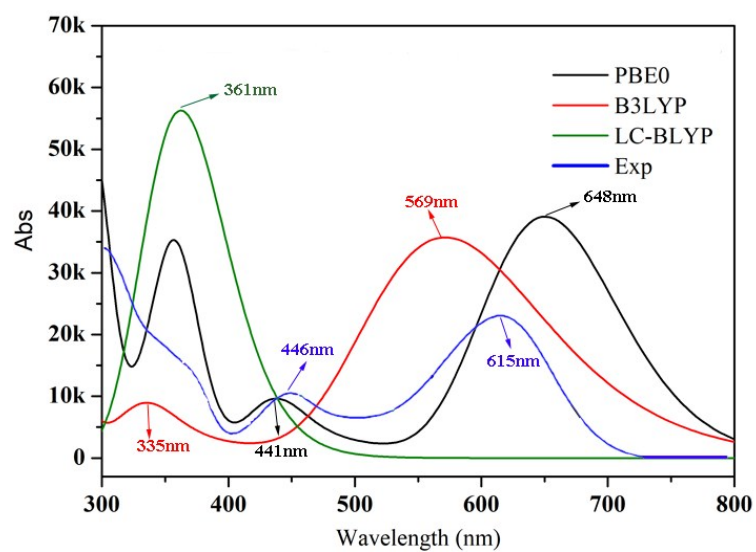

**Figure S1.** Simulated absorption spectrum of complex **2** at various levels of theory and experiment.

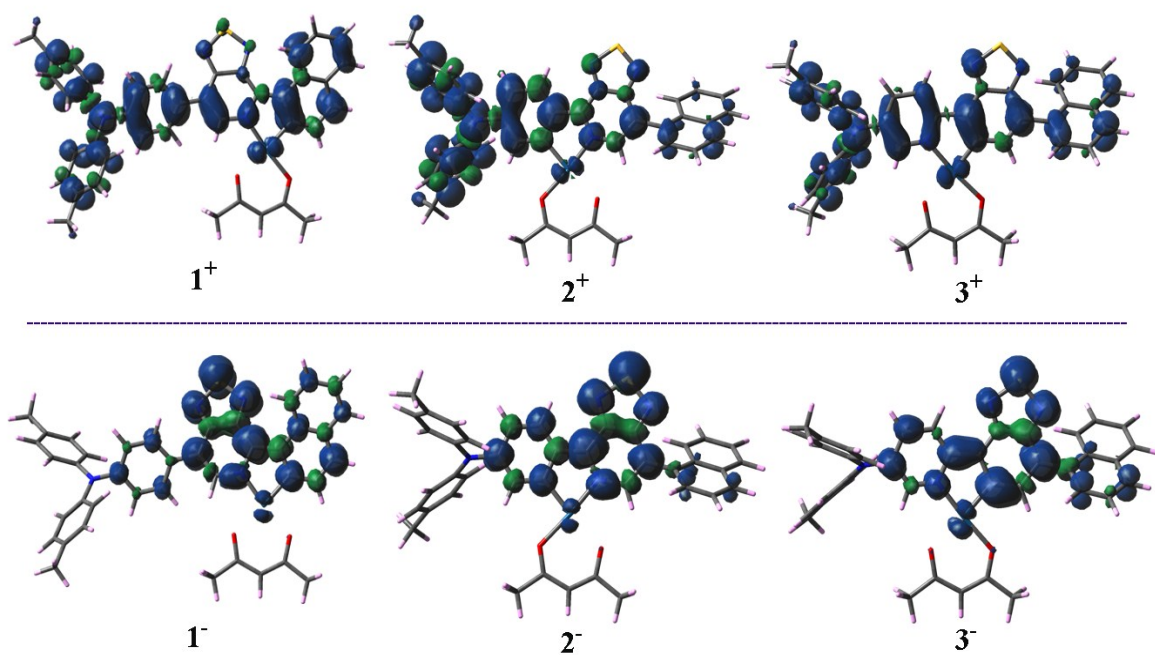

**Figure S2.** Mulliken spin populations of redox species.

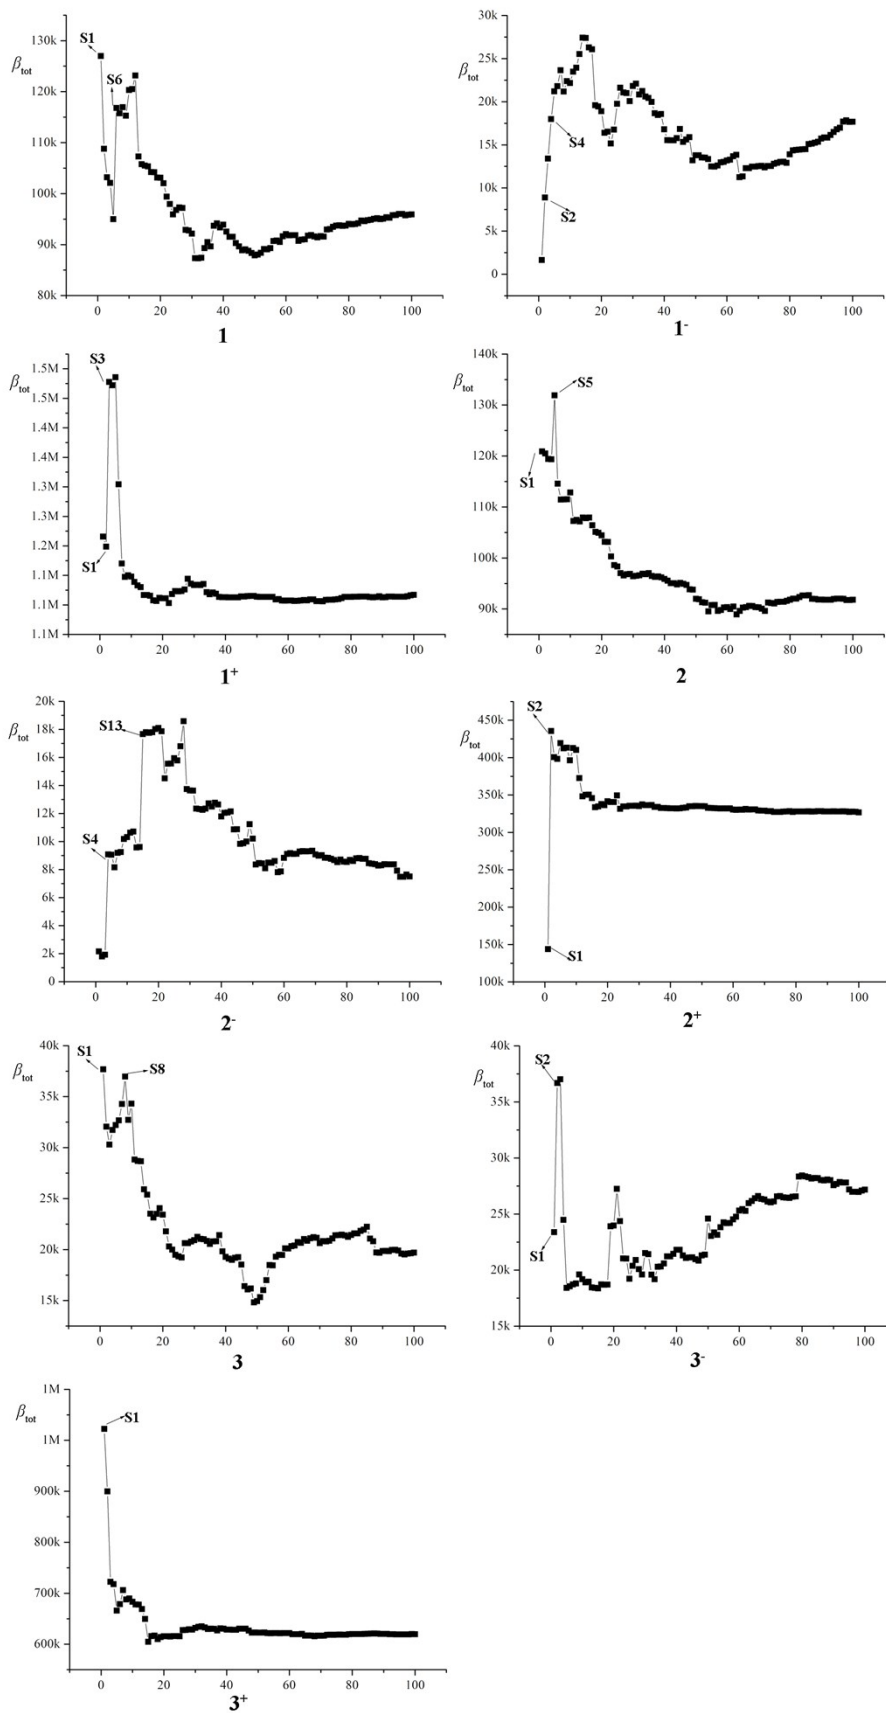

**Figure S3.** Convergent behavior of  $\beta_{tot}$  value of all complexes dependent on the 100 states.

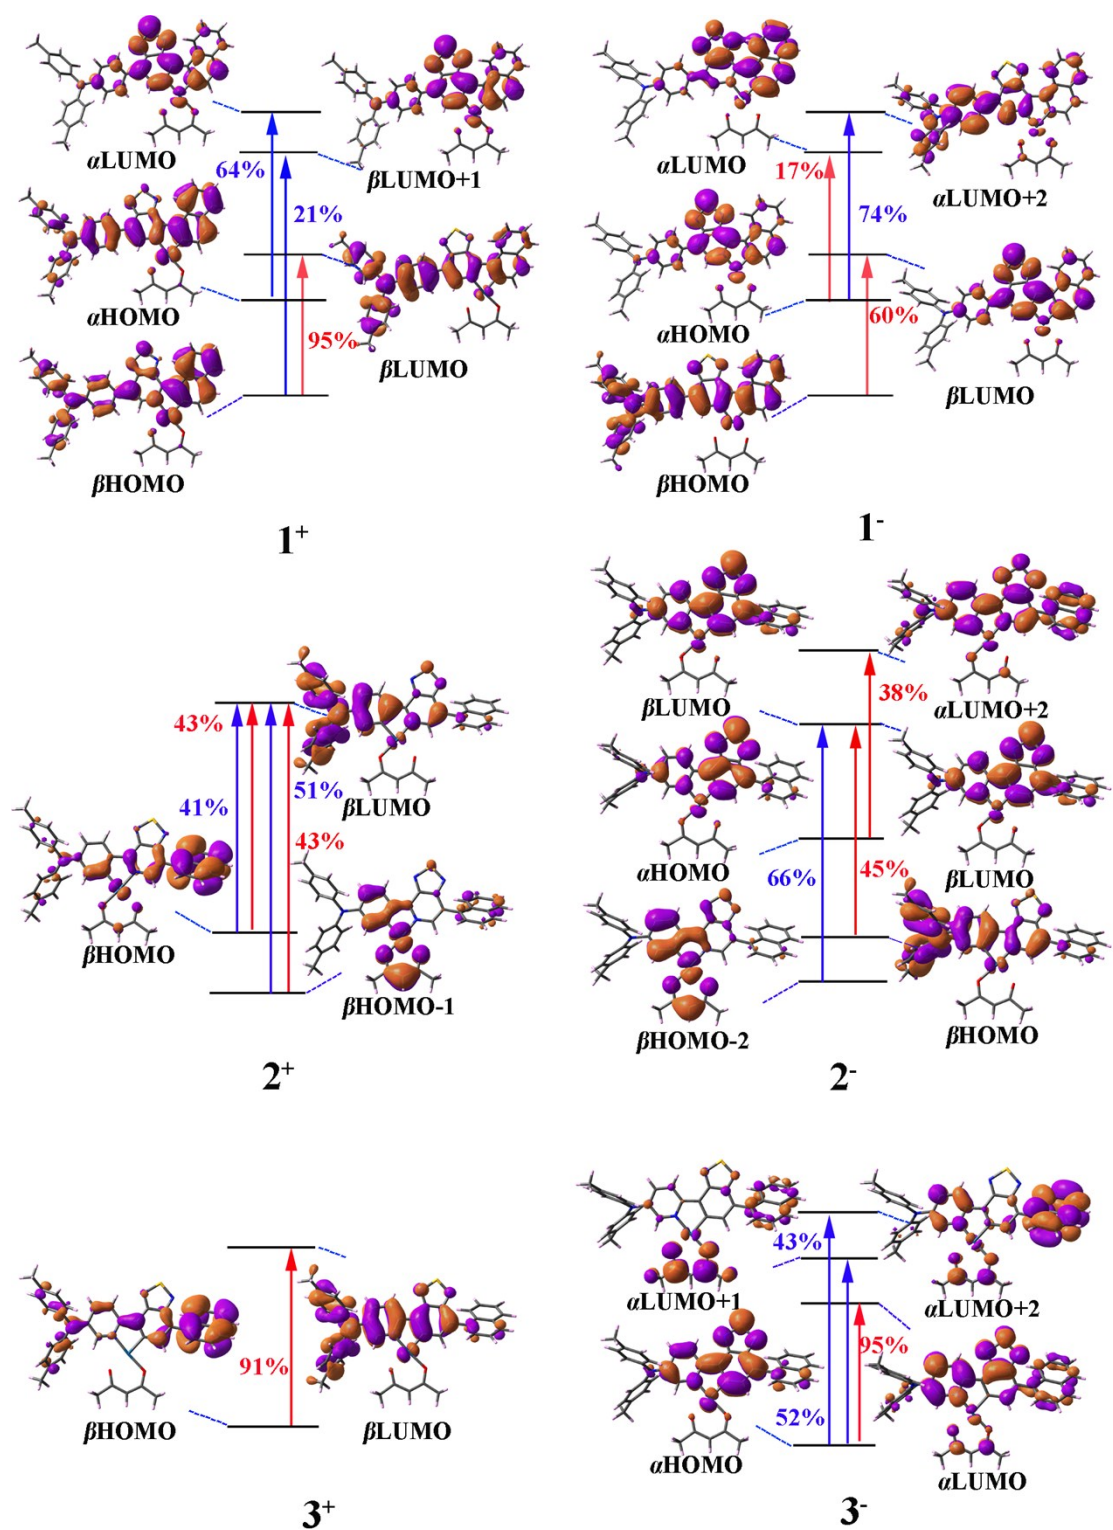

**Figure S4.** The molecular orbitals involved in the main excited states that contribute to the  $\beta_{\text{tot}}$  values for both reduced and oxide species.

**Table S1.** The calculated square of total spin and relative eigenvalue for all of oxidized and reduced complexes.

| Complex  | charge | Spin multiplicity | $\langle S^2 \rangle$ | eigenvalue |
|----------|--------|-------------------|-----------------------|------------|
| <b>1</b> | 1      | 2                 | 0.765                 | 0.75       |
|          | -1     | 2                 | 0.768                 | 0.75       |
| <b>2</b> | 1      | 2                 | 0.774                 | 0.75       |
|          | -1     | 2                 | 0.765                 | 0.75       |
| <b>3</b> | 1      | 2                 | 0.760                 | 0.75       |
|          | -1     | 2                 | 0.761                 | 0.75       |

**Table S2.** Tensorial components of  $\alpha$  ( $10^{-24}$ esu), the electronic spatial extent  $\langle R^2 \rangle$  ( $10^3$ a.u.) and total first hyperpolarizability ( $10^{-29}$ esu) of complex **1-3** calculated by the 6-31+G(d) basis set using various functionals.

| Complex  | functional     | $\beta_{\text{tot}}$ | $\alpha_{xx}$ | $\alpha_{yy}$ | $\alpha_{zz}$ | $\alpha$ | $\langle R^2 \rangle$ |
|----------|----------------|----------------------|---------------|---------------|---------------|----------|-----------------------|
| <b>1</b> | $\omega$ B97XD | 14.5                 | 68.8          | 171.5         | 140.6         | 127.1    | 47.3                  |
|          | LC-BLYP        | 7.4                  | 66.8          | 157.2         | 132.2         | 118.7    |                       |
|          | BHandHLYP      | 22.5                 | 67.6          | 174.1         | 136.8         | 126.2    |                       |
| <b>2</b> | $\omega$ B97XD | 32.9                 | 85.8          | 168.6         | 123.5         | 126.0    | 42.0                  |
|          | LC-BLYP        | 24.5                 | 83.1          | 155.7         | 115.6         | 118.1    |                       |
|          | BHandHLYP      | 40.8                 | 84.7          | 170.1         | 120.5         | 125.1    |                       |
| <b>3</b> | $\omega$ B97XD | 5.5                  | 87.1          | 149.7         | 122.5         | 119.8    | 41.2                  |
|          | LC-BLYP        | 3.4                  | 84.2          | 139.2         | 115.7         | 113.1    |                       |
|          | BHandHLYP      | 6.9                  | 85.8          | 148.3         | 119.3         | 117.8    |                       |

**Table S3.** The first hyperpolarizability ( $10^{-29}$ esu) of all neutral complexes computed by  $\omega$ B97XD functional with various basis sets.

| basis set  | <b>1</b> | <b>2</b> | <b>3</b> |
|------------|----------|----------|----------|
| 6-31G(d)   | 13.9     | 32.1     | 4.7      |
| 6-31+G(d)  | 14.5     | 32.9     | 5.5      |
| 6-311+G(d) | 14.2     | 32.5     | 5.3      |
| 6-311G(d)  | 13.7     | 31.4     | 4.8      |
